# Supplementary material
Source: PubMed Central journal article supplement (PMC2528990)
Supplement: supp_M803370200_080625Supplementary_Fig1.pdf [file supp_M803370200_080625Supplementary_Fig1.pdf]

## Supplementary Figure 1

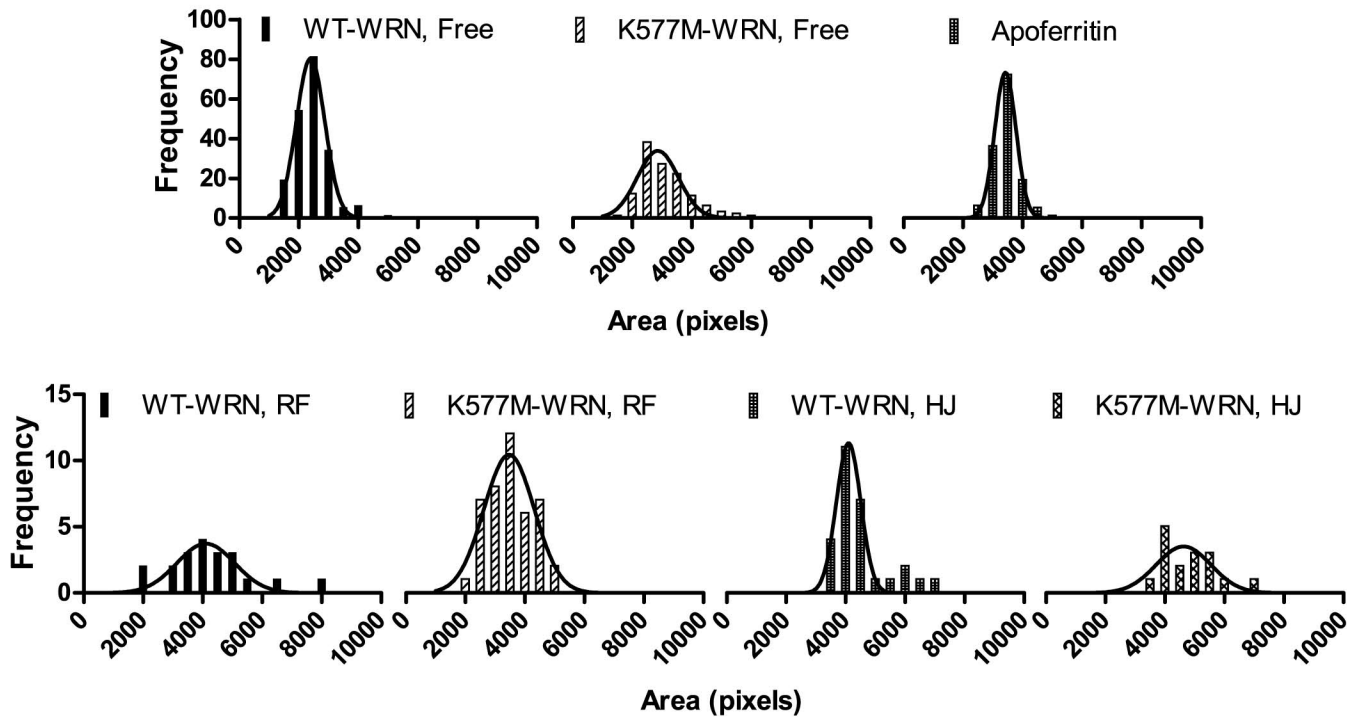

**Size Distribution Histograms of Wild-type and K577M-WRN with Calculated Gaussian Curves.** The projected areas of free and DNA-bound wild-type and K577M-WRN, and apoferritin were measured from EM images and used to construct frequency distribution histograms. Each histogram was fitted with a Gaussian distribution using GraphPad Prism (version 5) to determine peak values. RF and HJ refer to replication fork DNA and Holliday junction DNA, respectively.
